# Supplementary material for: Physiological Response to Social Evaluative Threat in Adolescents with Autism Spectrum Disorder
Source: Springer Nature journal article supplement (doi:10.1007/s10803-016-2842-1), 2016-06-18
Supplement: MOESM1 [file 10547834]

**Supplemental Table** Diagnosis by Gender Demographics

| Group (N) | | Age (SD) | PDS Score (SD) | Verbal IQ (SD) | Performance IQ (SD) | FSIQ (SD) | SCQ Total Score (SD) | SRS Total T Score (SD) |
| --- | --- | --- | --- | --- | --- | --- | --- | --- |
| TD (17) | Male (13) | 14.77 (1.70) | 2.80  (0.60) | 118.15 (14.44) | 112.92 (9.33) | 117.69 (11.63) | 2.23  (2.09) | 42.08 (3.12) |
| Female (4) | 16.46 (0.92) | 3.80 (0.16) | 122.25 (7.59) | 109.00 (11.11) | 117.50 (6.46) | 0.50 (1.00) | 42.50 (2.89) |
| ASD (25) | Male (21) | 14.99 (1.35) | 3.04  (0.46) | 104.24 (23.90) | 108.86 (15.92) | 107.19 (20.93) | 21.67 (10.48) | 75.00 (10.92) |
| Female (4) | 14.60 (2.43) | 3.65 (0.34) | 86.50 (11.03) | 94.25  (9.14) | 89.00 (6.98) | 18.25 (12.42) | 82.75 (8.85) |

PDS= Pubertal Development Scale, FSIQ=Full Scale IQ, SCQ= Social Communication Questionnaire, SRS=Social Responsiveness
